# Supplementary material
Source: ML conference proceedings conference paper supplement (https://proceedings.neurips.cc/paper_files/paper/2018/hash/e836d813fd184325132fca8edcdfb40e-Abstract.html)
Supplement: Supplementary file [file e836d813fd184325132fca8edcdfb40e-Supplemental.zip]

## A Prox shift

We want to find a simple, numerically-friendly expression for

$$-d(q) + \langle \nabla d(q), q \rangle$$

First we derive an expression for  $\langle \nabla d(q), q \rangle$ . Let  $i \in \mathbb{I}_j$  and  $n_j$  be the dimensionality of simplex  $j$ . Taking derivatives we have

$$\begin{aligned} \nabla_{ji} d(q) &= \beta_j \left( \log \frac{q_i}{q_{p_j}} + 1 \right) + \sum_{k \in \mathcal{D}_j^i} \beta_k \left( \log n_k - \sum_{i' \in \mathbb{I}_k} \frac{x_{i'}}{x_{p_k}} \right) \\ &= \beta_j \left( \log \frac{q_i}{q_{p_j}} + 1 \right) + \sum_{k \in \mathcal{D}_j^i} \beta_k (\log n_k - 1) \end{aligned}$$

Taking the inner product with  $q$  gives

$$\langle \nabla d(q), q \rangle = \sum_{j \in S_Q; i \in \mathbb{I}_j} q_i \left[ \beta_j \left( \log \frac{q_i}{q_{p_j}} + 1 \right) + \sum_{k \in \mathcal{D}_j^i} \beta_k (\log n_k - 1) \right]$$

Subtracting  $-d(q)$  gives

$$\begin{aligned} -d(q) + \langle \nabla d(q), q \rangle &= - \sum_{j \in S_Q; i \in \mathbb{I}_j} \beta_j q_i \log \frac{q_i}{q_{p_j}} - \sum_{j \in S_Q} \beta_j q_{p_j} \log(n_j) \\ &\quad + \sum_{j \in S_Q; i \in \mathbb{I}_j} q_i \left[ \beta_j \left( \log \frac{q_i}{q_{p_j}} + 1 \right) + \sum_{k \in \mathcal{D}_j^i} \beta_k (\log n_k - 1) \right] \\ &= \sum_{j \in S_Q; i \in \mathbb{I}_j} q_i \beta_j + \sum_{j \in S_Q} \sum_{k \in \mathcal{D}_j^i} q_{p_k} \beta_k (\log n_k - 1) - \sum_{j \in S_Q} \beta_j q_{p_j} \log(n_j) \\ &= \sum_{j \in S_Q} q_{p_j} \beta_j + \sum_{j \in S_Q} \sum_{k \in \mathcal{D}_j^i} q_{p_k} \beta_k (\log n_k - 1) - \sum_{j \in S_Q} \beta_j q_{p_j} \log(n_j) \\ &= \sum_{j \in S_Q} \sum_{k \in \mathcal{D}_j^i} q_{p_k} \beta_k (\log n_k - 1) - \sum_{j \in S_Q} \beta_j q_{p_j} (\log(n_j) - 1) \\ &= - \sum_{j \in S_Q; b_Q^j = 0} \beta_j q_{p_j} (\log(n_j) - 1) \end{aligned}$$
